# Supplementary material for: Engineered whole cut meat-like tissue by the assembly of cell fibers using tendon-gel integrated bioprinting
Source: PubMed Central journal article supplement (PMC8385070; doi:10.1038/s41467-021-25236-9), 2021-08-24
Supplement: 41467_2021_25236_MOESM1_ESM.pdf [file 41467_2021_25236_MOESM1_ESM.pdf]

# **Engineered Whole Cut Meat-like Tissue by the Assembly of Cell Fibers using Tendon-Gel Integrated Bioprinting**

*Dong-Hee Kang<sup>1</sup>, Fiona Louis<sup>2</sup>, Hao Liu<sup>1</sup>, Hiroshi Shimoda<sup>3</sup>, Yasutaka Nishiyama<sup>4</sup>, Hajime Nozawa<sup>5</sup>, Makoto Kakitani<sup>5</sup>, Daisuke Takagi<sup>6</sup>, Daijiro Kasa<sup>7</sup>, Eiji Nagamori<sup>8</sup>, Shinji Irie<sup>2,9</sup>, Shiro Kitano<sup>2,9</sup>, and Michiya Matsusaki<sup>1,2\*</sup>*

<sup>1</sup>Division of Applied Chemistry, Graduate School of Engineering, Osaka University, 2-1 Yamadaoka, Suita, Osaka 565-0871, Japan

<sup>2</sup>Joint Research Laboratory (TOPPAN INC.) for Advanced Cell Regulatory Chemistry, Graduate School of Engineering, Osaka University, 2-1 Yamadaoka, Suita, Osaka 565-0871, Japan

<sup>3</sup>Department of Anatomical Science, Hirosaki University Graduate School of Medicine, 5 Zaifu-cho, Hirosaki, 036-8562, Japan.

<sup>4</sup>NH Foods, Ltd., 3-3 Midorigahara, Tsukuba, Ibaraki 300-2646, Japan.

<sup>5</sup>Kirin Central Research Institute, Kirin Holdings Company, Ltd., 26-1, Muraoka-Higashi 2, Fujisawa Kanagawa 251-8555, Japan.

<sup>6</sup>Biomedical Business Center, Healthcare Business Group, Ricoh Company, Ltd., 3-25-22 Tonomachi LIC 322, Kawasaki-shi, Kanagawa 210-0821, Japan.

<sup>7</sup>Solution Planning, Product Solution Technologies, Production Printing, Industrial Solutions, Ricoh Japan Corporation, 4-2-8 Shibaura, Minato-ku, Tokyo 108-0023, Japan.

<sup>8</sup>Department of Biomedical Engineering, Faculty of Engineering, Osaka Institute of Technology, 5-16-1 Omiya, Asahi-ku, Osaka 535-8585, Japan

<sup>9</sup>TOPPAN INC., Technical Research Institute, 4-2-3 Takanodaiminami, Sugito-machi, Saitama, 345-8508, Japan.

\*Corresponding author foot note:

Professor Michiya Matsusaki, PhD

E-mail: m-matsus@chem.eng.osaka-u.ac.jp

Keywords: Engineered steak-like meat, Tendon-integrated bioprinting, Cell fibers

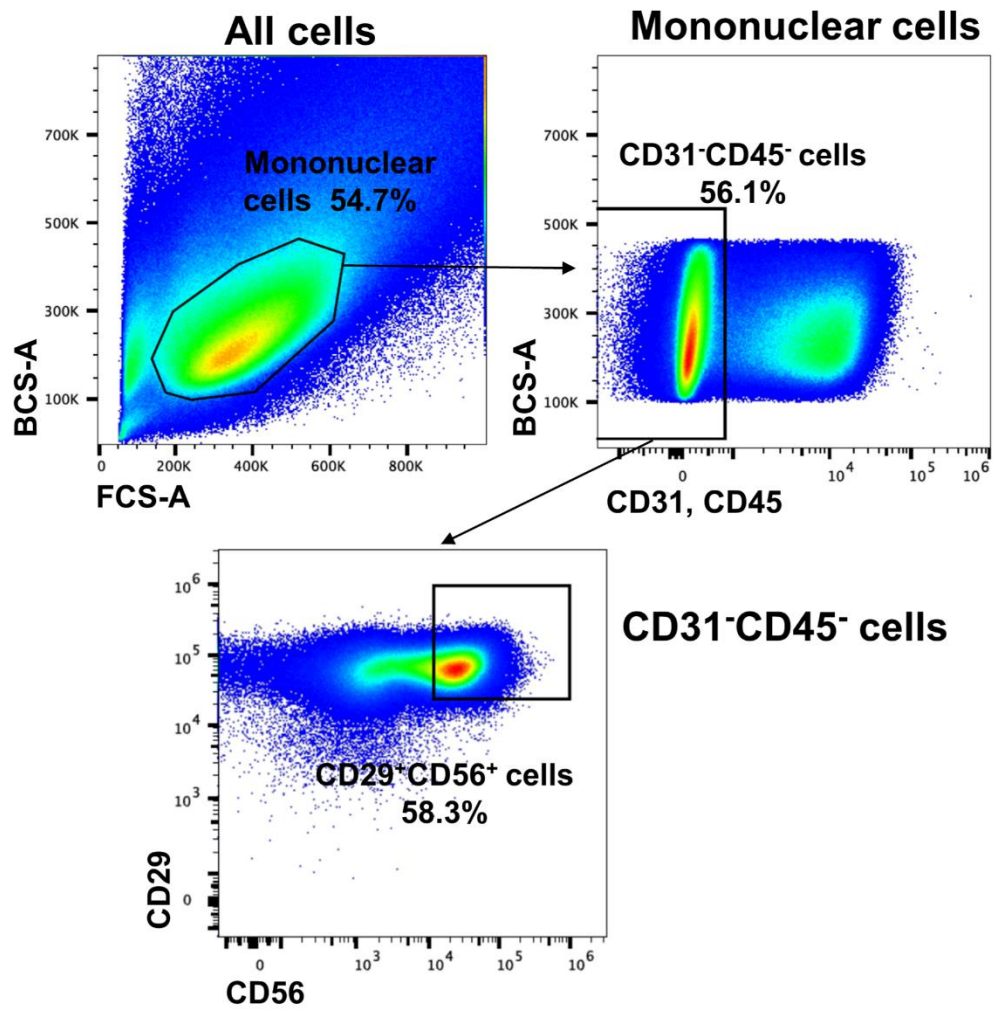

**Supplementary Fig. 1 Bovine satellite cells isolation by fluorescence-activated cell sorting.**  
 Gating strategy for cell sorting of bovine CD31<sup>-</sup>CD45<sup>-</sup>CD29<sup>+</sup>CD56<sup>+</sup> cells.

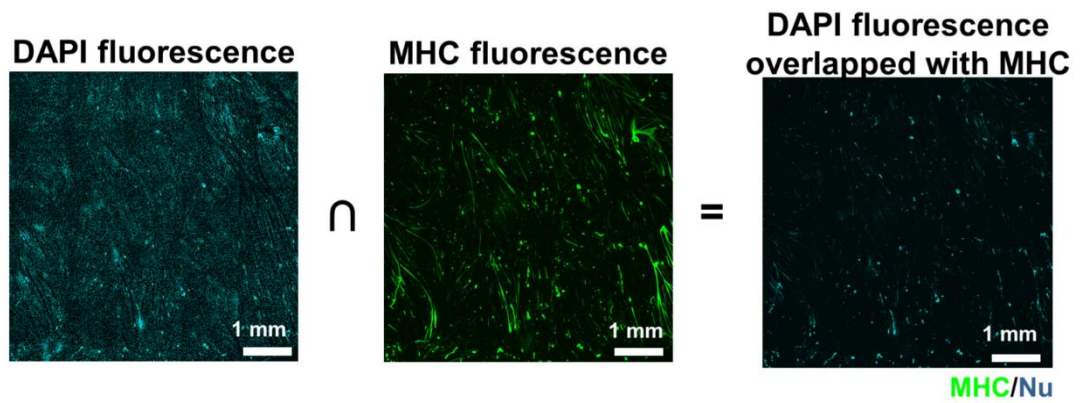

**Supplementary Fig. 2 Measurement method of differentiation ratio of bSCs into muscle cells.** ‘Whole DAPI fluorescence’ is divided by ‘DAPI fluorescence overlapped with MHC’. DAPI fluorescence overlapped with MHC is obtained in ImageJ software (green: MHC & blue: nucleus). Representative images from three independent experiments are shown.

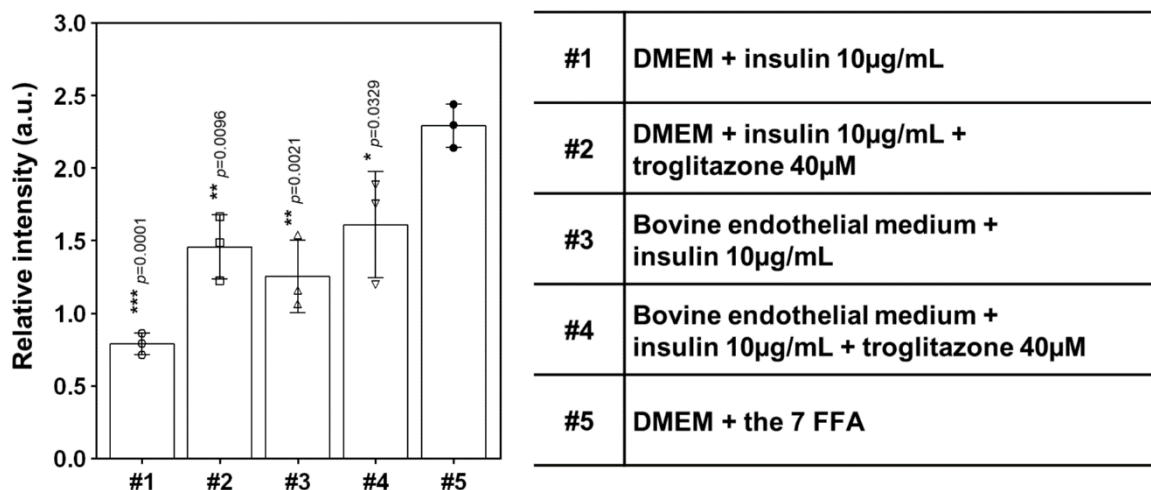

|    |                                                                 |
|----|-----------------------------------------------------------------|
| #1 | DMEM + insulin 10µg/mL                                          |
| #2 | DMEM + insulin 10µg/mL + troglitazone 40µM                      |
| #3 | Bovine endothelial medium + insulin 10µg/mL                     |
| #4 | Bovine endothelial medium + insulin 10µg/mL + troglitazone 40µM |
| #5 | DMEM + the 7 FFA                                                |

**Supplementary Fig. 3 Comparison of free fatty acids and conventional adipogenesis conditions.** Adipogenesis ratio (left) of 3D gel drop cultured bADSCs derived by several conditions (right) on day 7. The used bADSCs were extracted from a subcutaneous fat (n = 3 independent samples, unpaired one-way ANOVA with a Tukey’s HSD post-test compared to the condition #5). \* $p < 0.05$ , \*\* $p < 0.01$ , \*\*\* $p < 0.001$ ; error bars represent mean  $\pm$  s.d. Source data are provided as a Source Data file.

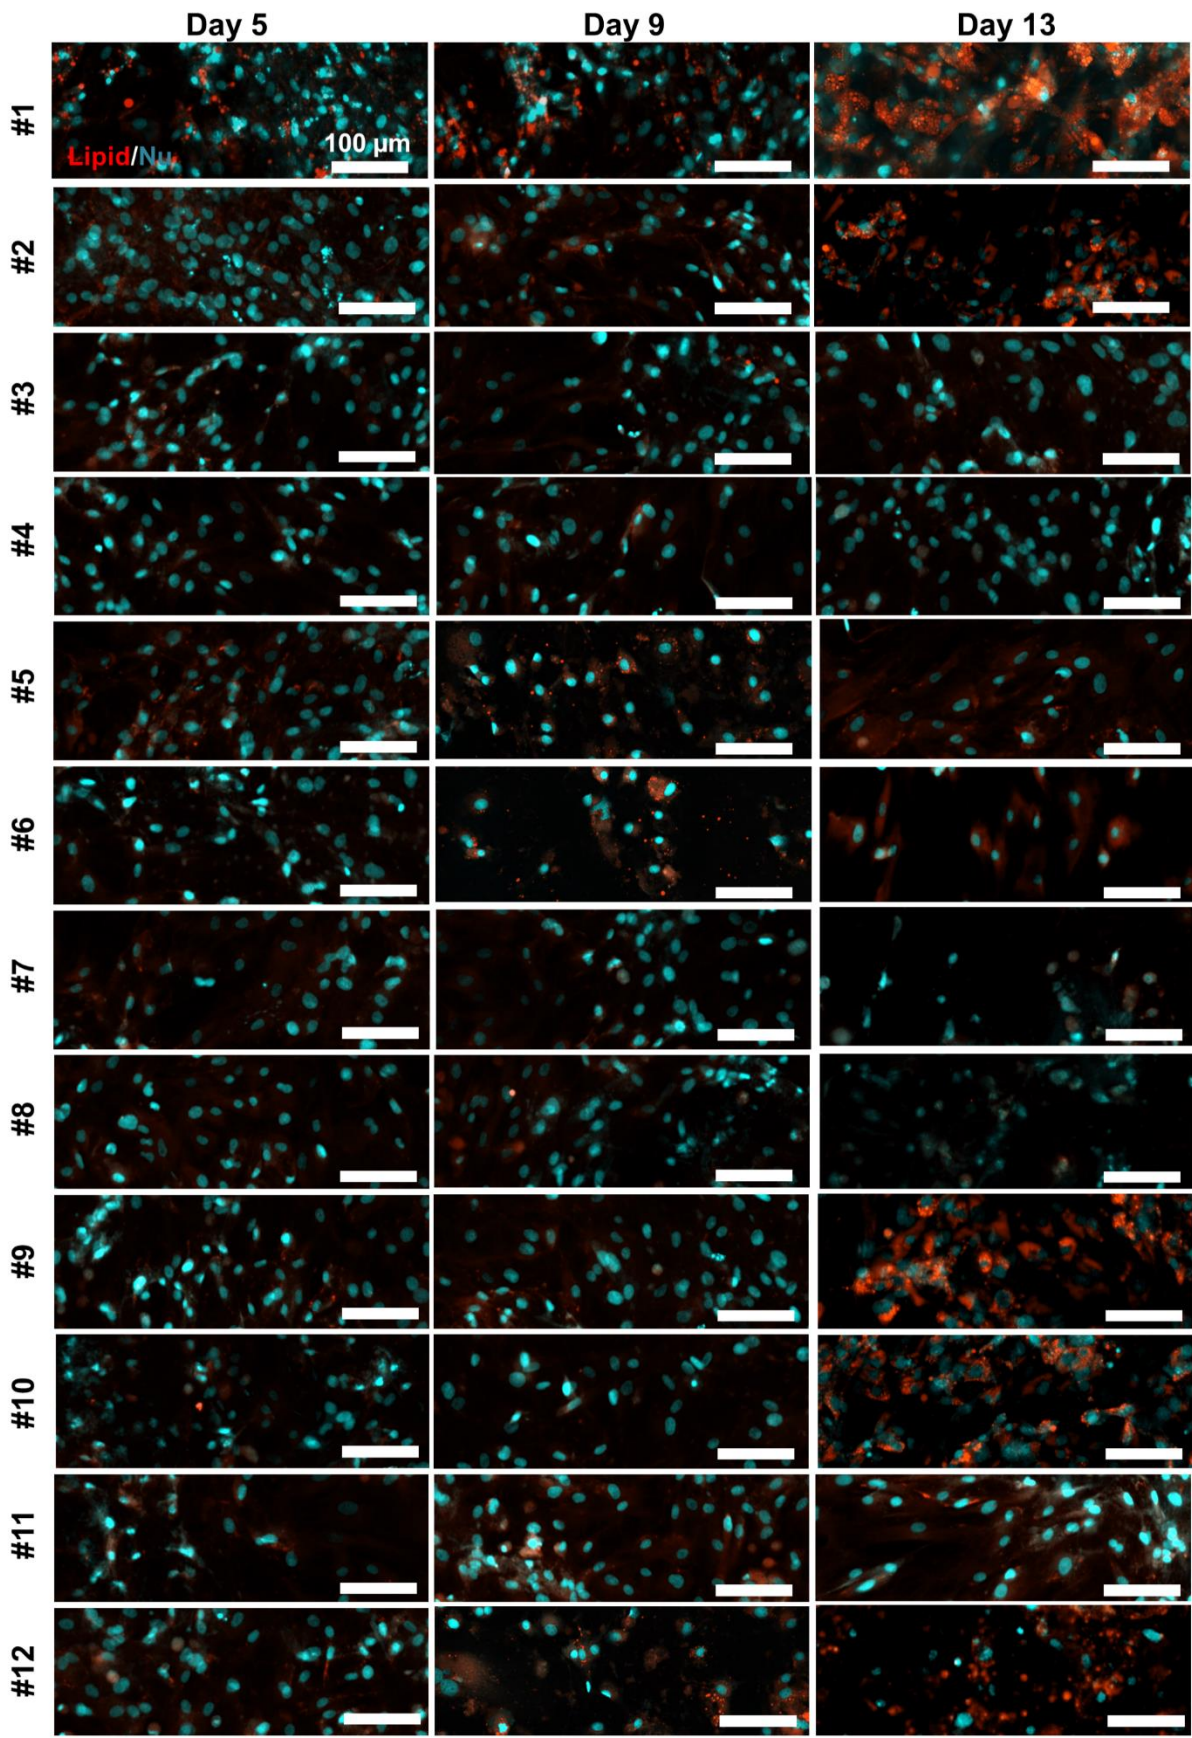

**Supplementary Fig. 4 Summed z-stack projections immunofluorescence images of the lipid droplet production of bADSCs by 12 combinations of free fatty acids, or rosiglitazone (#4), in DMEM.** The used bADSCs were extracted from subcutaneous fat and all images were taken on day 5, 9, and 13 (red: lipid & blue: nucleus). Representative images from four independent experiments are shown.



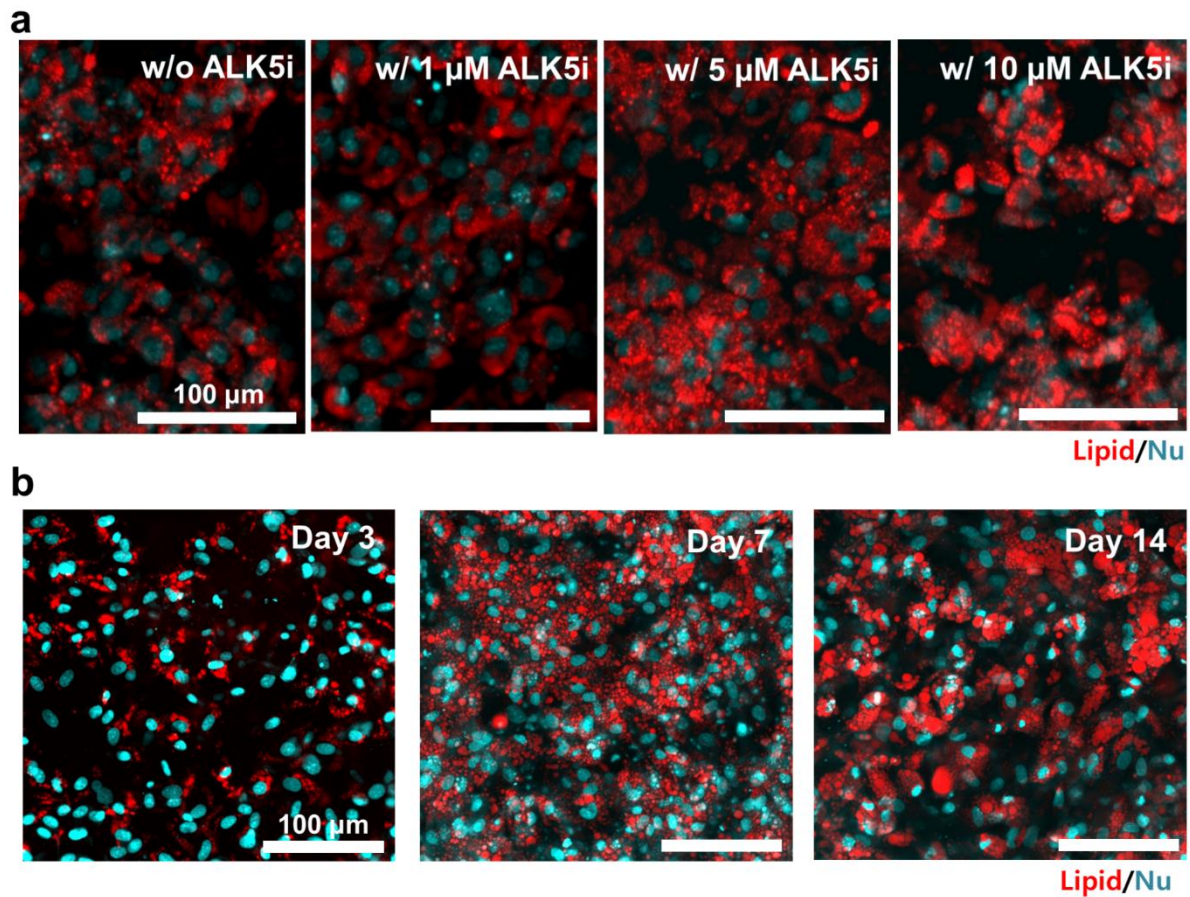

**Supplementary Fig. 5 Summed z-stack projections immunofluorescence images of 3D cultured bADSCs depending on the concentration of ALK5i and culture day. (a) With different concentrations (0, 1  $\mu$ M, 5  $\mu$ M, and 10  $\mu$ M) of ALK5i at day 7 and (b) different culture day (3, 7, and 14) in the #1 combination of free fatty acids (red: lipid & blue: nucleus). Representative images from five (a) and three (b) independent experiments are shown.**

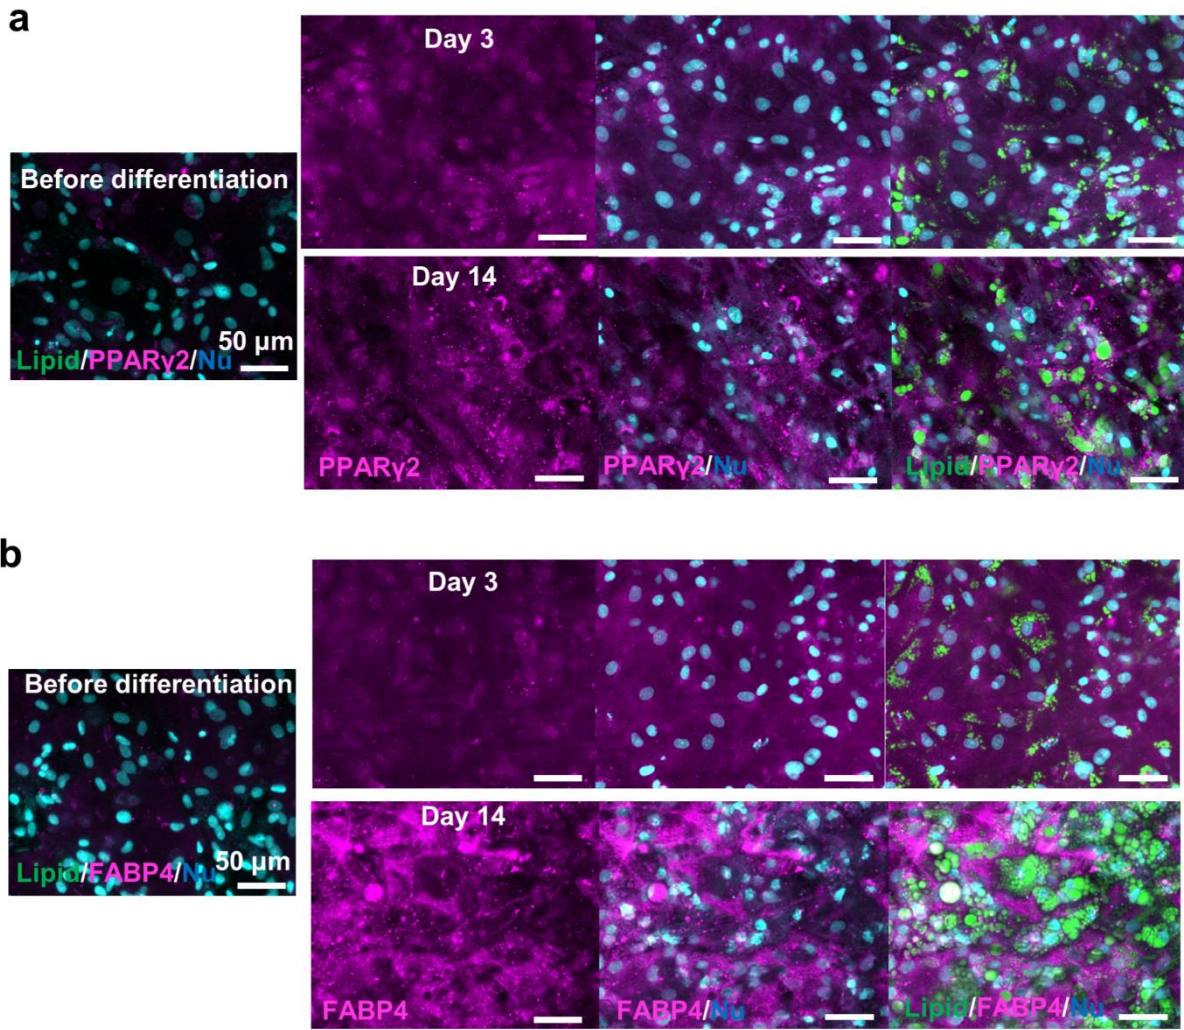

**Supplementary Fig. 6 Z-stack projections immunofluorescence images of 3D cultured bADSCs in the optimized media condition.** Immunostaining images of (a) PPAR $\gamma$ 2 and (b) FABP4 at before differentiation, day 3, and day 14 (magenta: PPAR $\gamma$ 2 or FABP4, green: lipid, and blue: nucleus). Representative images from three independent experiments are shown.



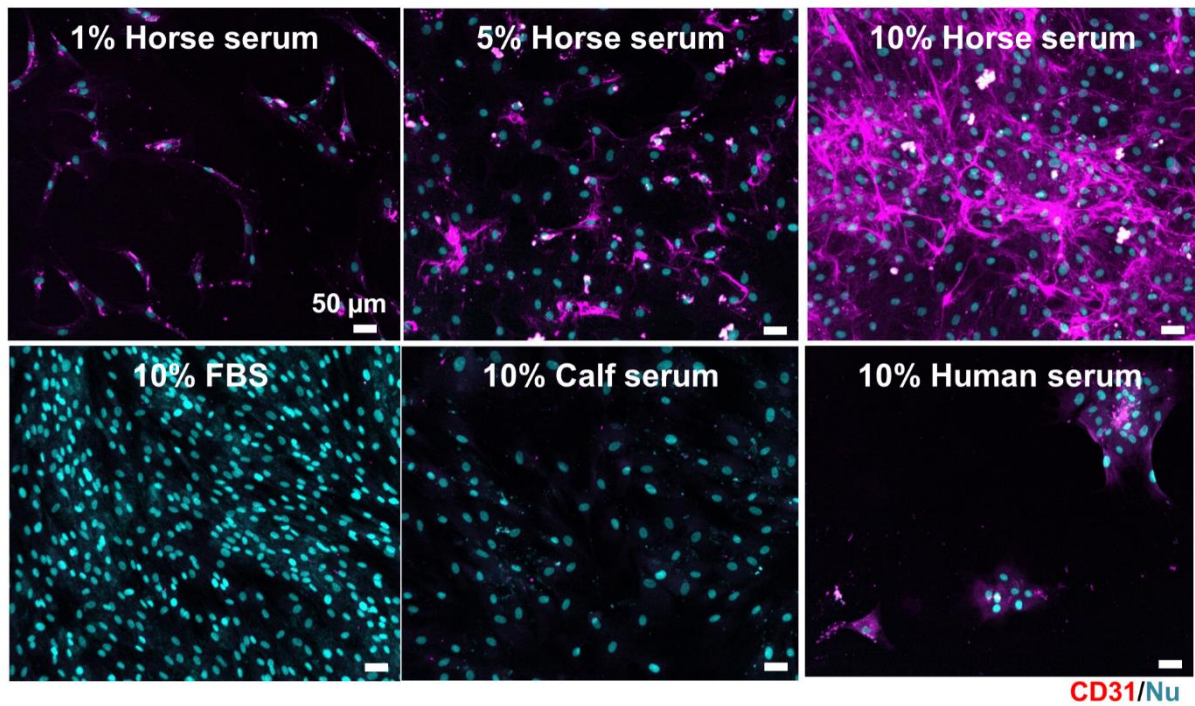

**Supplementary Fig. 7 Immunofluorescence images of CD31 expression of bADSCs depending on serum conditions.** The used bADSCs were extracted from a subcutaneous fat tissue and cells were stained with CD31 (magenta) and nucleus (blue) on day 7. Representative images from three independent experiments are shown.

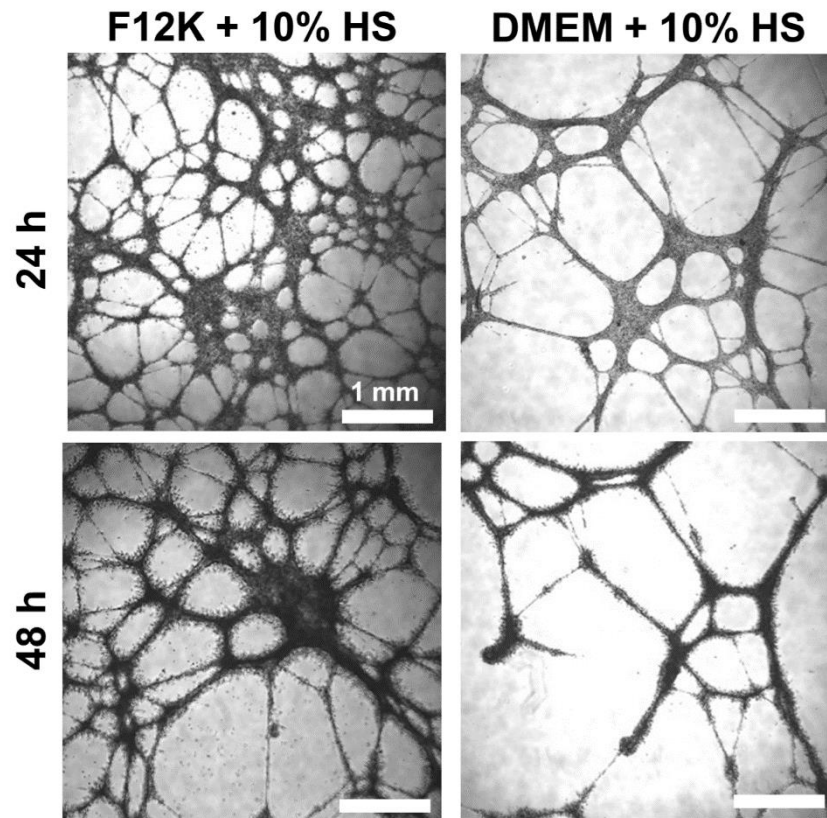

**Supplementary Fig. 8 Tubulogenesis assay.** Bright-field images of bADSCs ( $5 \times 10^5$  cells/well) that were cultured on Matrigel (10mg/mL, 300 $\mu$ L in a 24 well plate) in F12K (left) and DMEM (right) with 10% HS at 24 h and 48 h. Representative images from one experiment are shown.

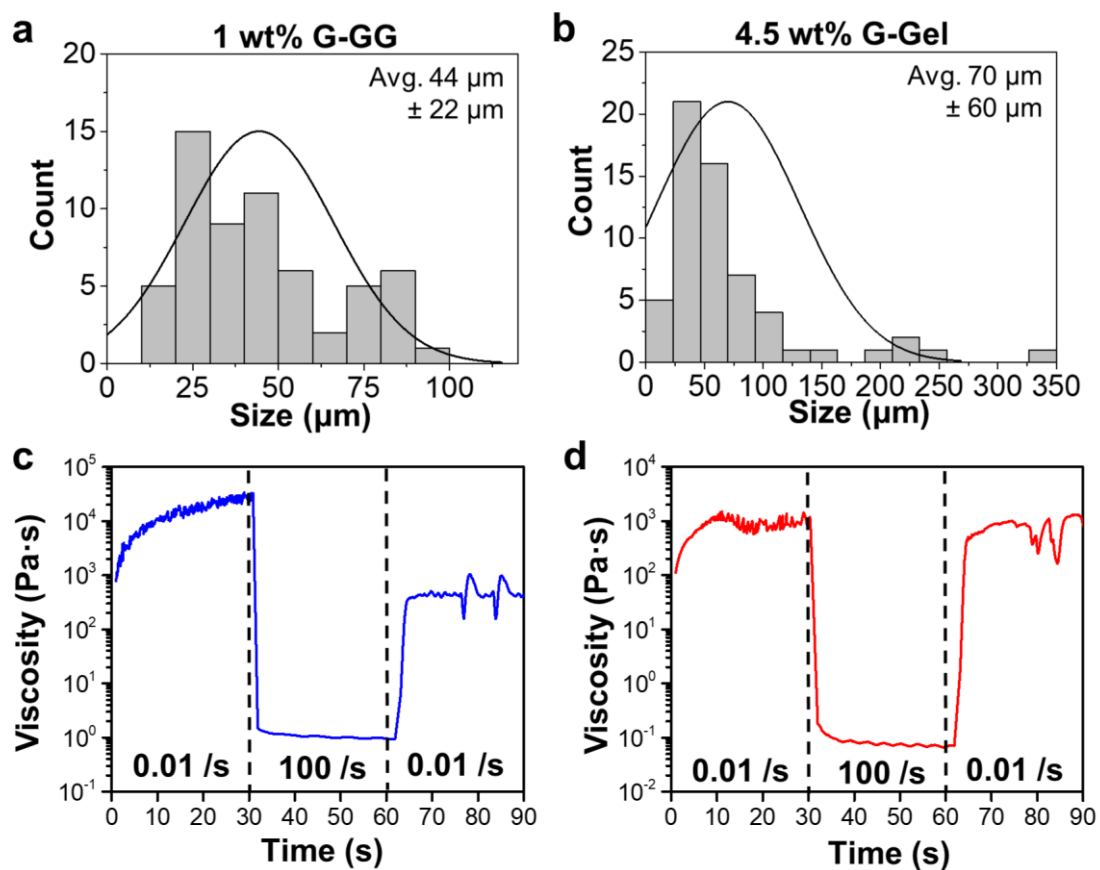

**Supplementary Fig. 9 Particle size distributions and rheological measurements of G-GG (a & c) & G-Gel (b & d).** Viscosity was measured in 3 steps of controlled shear rate mode; low-shear rate (0.01 /s) for 30 s, high-shear rate (100 /s) for 30 s, and low-shear rate (0.01 /s) for 30s. Source data are provided as a Source Data file.

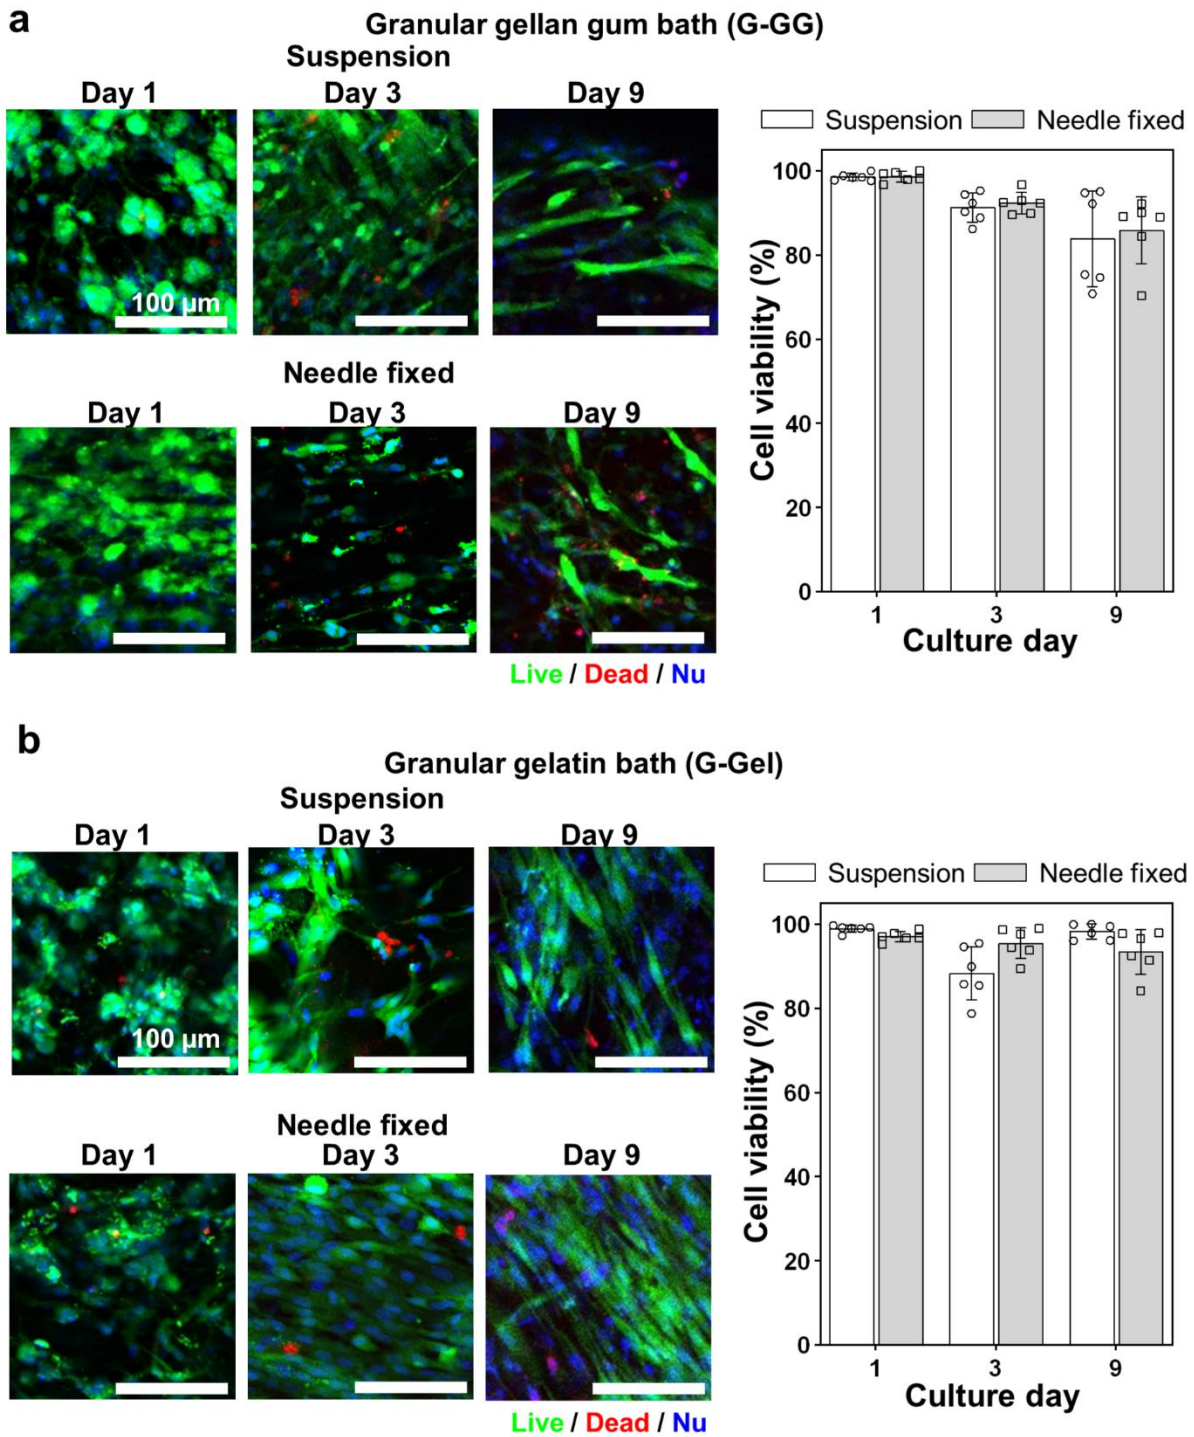

**Supplementary Fig. 10 Cell viability of bSCs by SBP.** Representative images (left) and the image-based cell viability (right) at day 1, 3, and 9 after printing inside granular gellan gum bath (a) and granular gelatin bath (b) (n = 6 independent areas examined over independent 2 or 3 samples, green: live cells, red: dead cells, and blue: nucleus). Error bars represents mean  $\pm$  s.d. Source data are provided as a Source Data file.



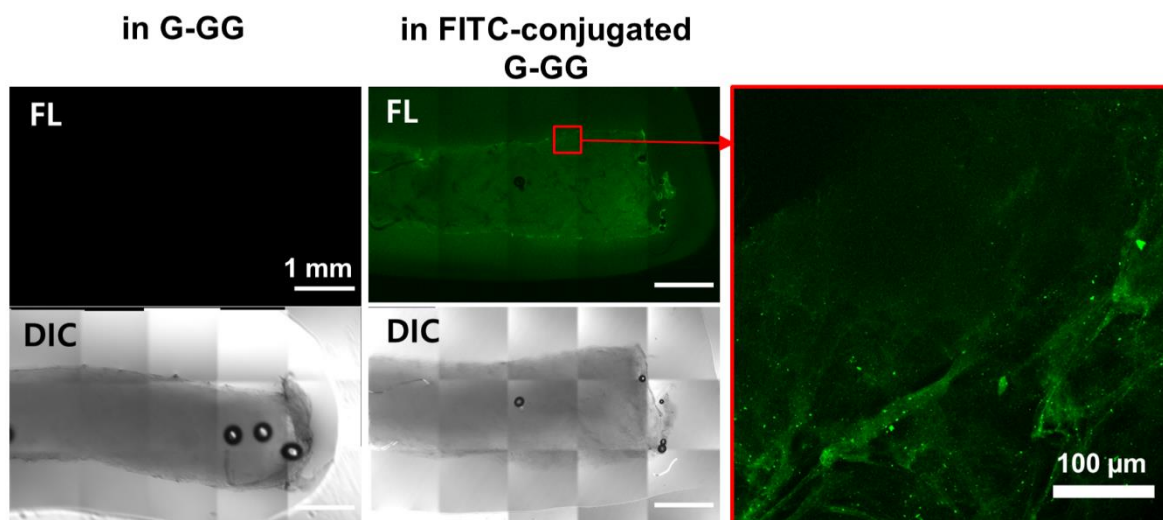

**Supplementary Fig. 11 Remaining G-GG in printed structure.** The DIC images & fluorescence (FL) images of fibrin gels printed inside G-GG (left) and FITC-conjugated G-GG (right) bath after the removal process in which the printed fiber was immersed at 50 mM Tris-HCl buffer (pH 7.4) for 1h. The buffer was replaced with a fresh one every 30 min. Representative images from two independent experiments are shown.

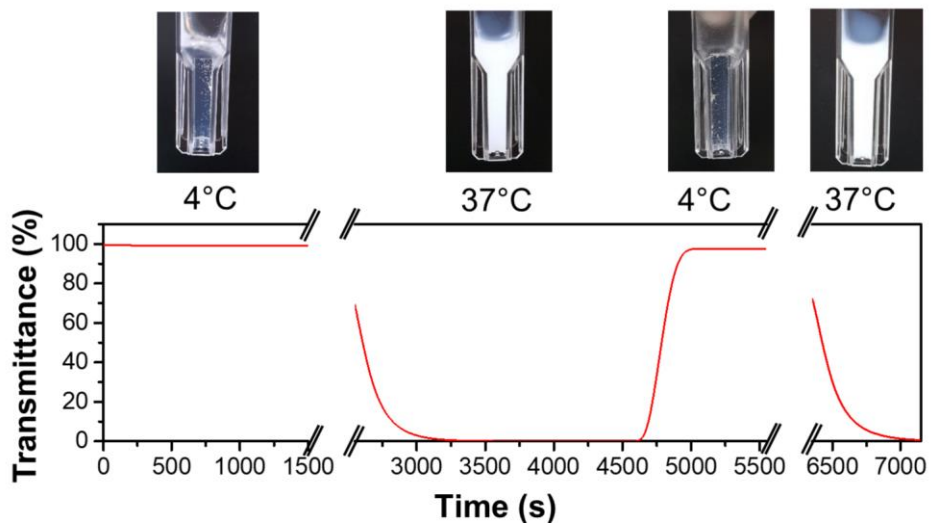

**Supplementary Fig. 12 Sol-gel behavior of collagen nanofiber solution (CNFs).** The optical images (upper) and transmittance (lower) of 4 wt% CNF fabricated from the mixture of collagen type I & III at steps of 4°C, 37°C, 4°C, and 37°C.

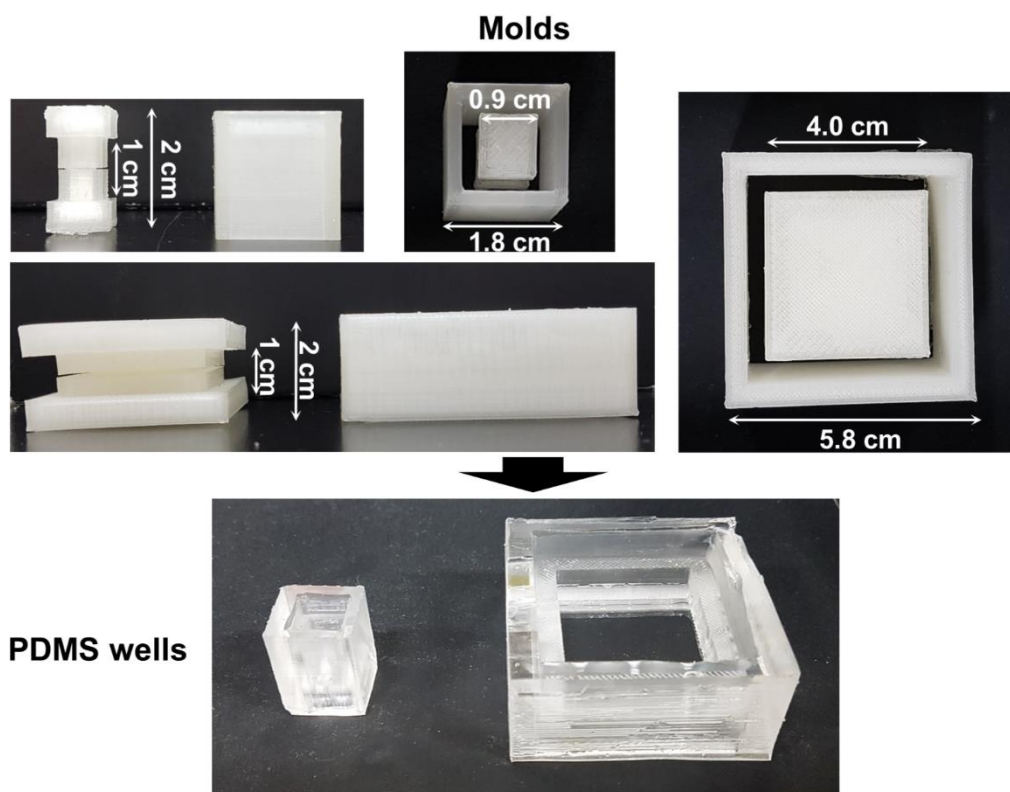

**Supplementary Fig. 13 The fabrication of PDMS wells for TIP.** The optical images of PDMS wells (lower) through the molds fabricated by FDM 3D printer (upper).

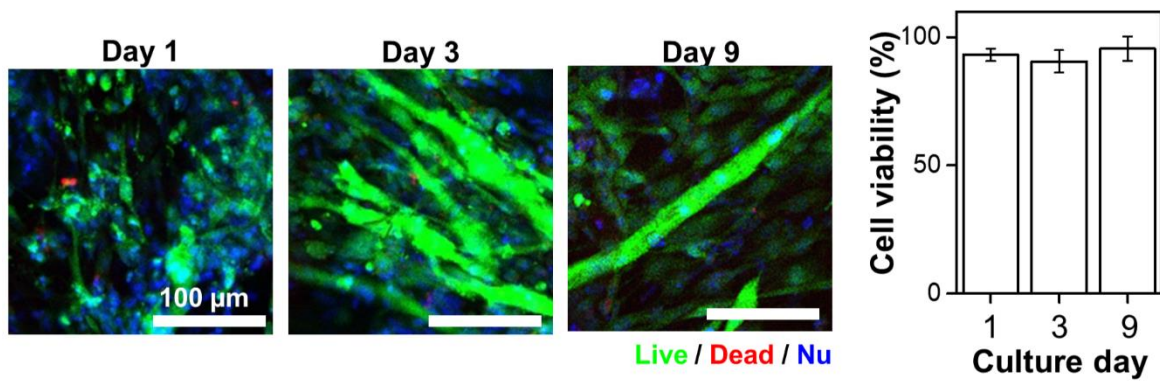

**Supplementary Fig. 14 Cell viability of bSC printed by TIP.** Error bars represents mean  $\pm$  s.d. (n = 6 or 7 independent areas examined over independent 2 or 3 samples, green: live cells, red: dead cells, and blue: nucleus). Source data are provided as a Source Data file.



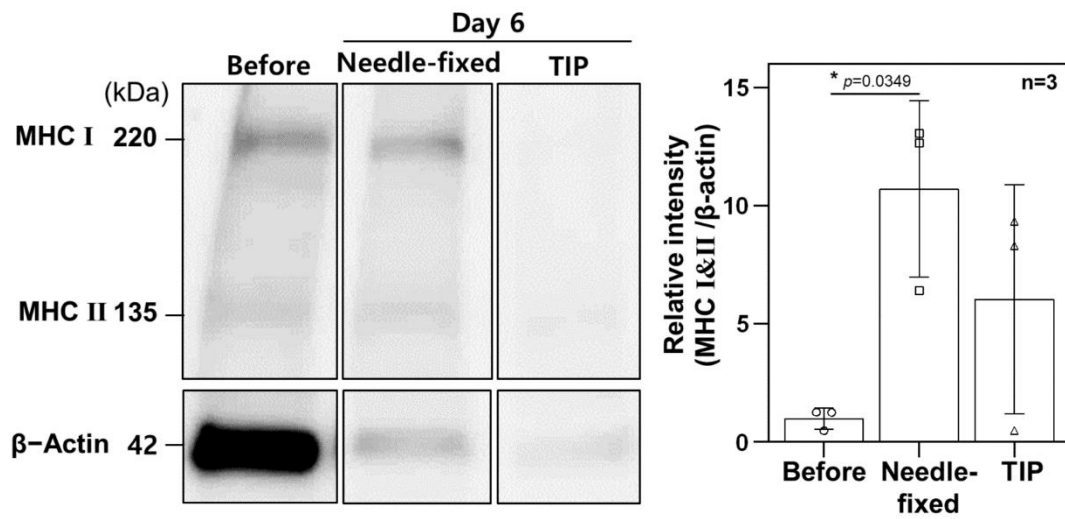

**Supplementary Fig. 15 Western blot analysis of bSCs.** Proteins were detected by using MHC (I&II) and  $\beta$ -actin antibodies (n = 3 independent samples, unpaired one-way ANOVA with a Tukey's HSD post-test). \* $p < 0.05$  compared to before printing. Error bars represents mean  $\pm$  s.d. Source data are provided as a Source Data file.

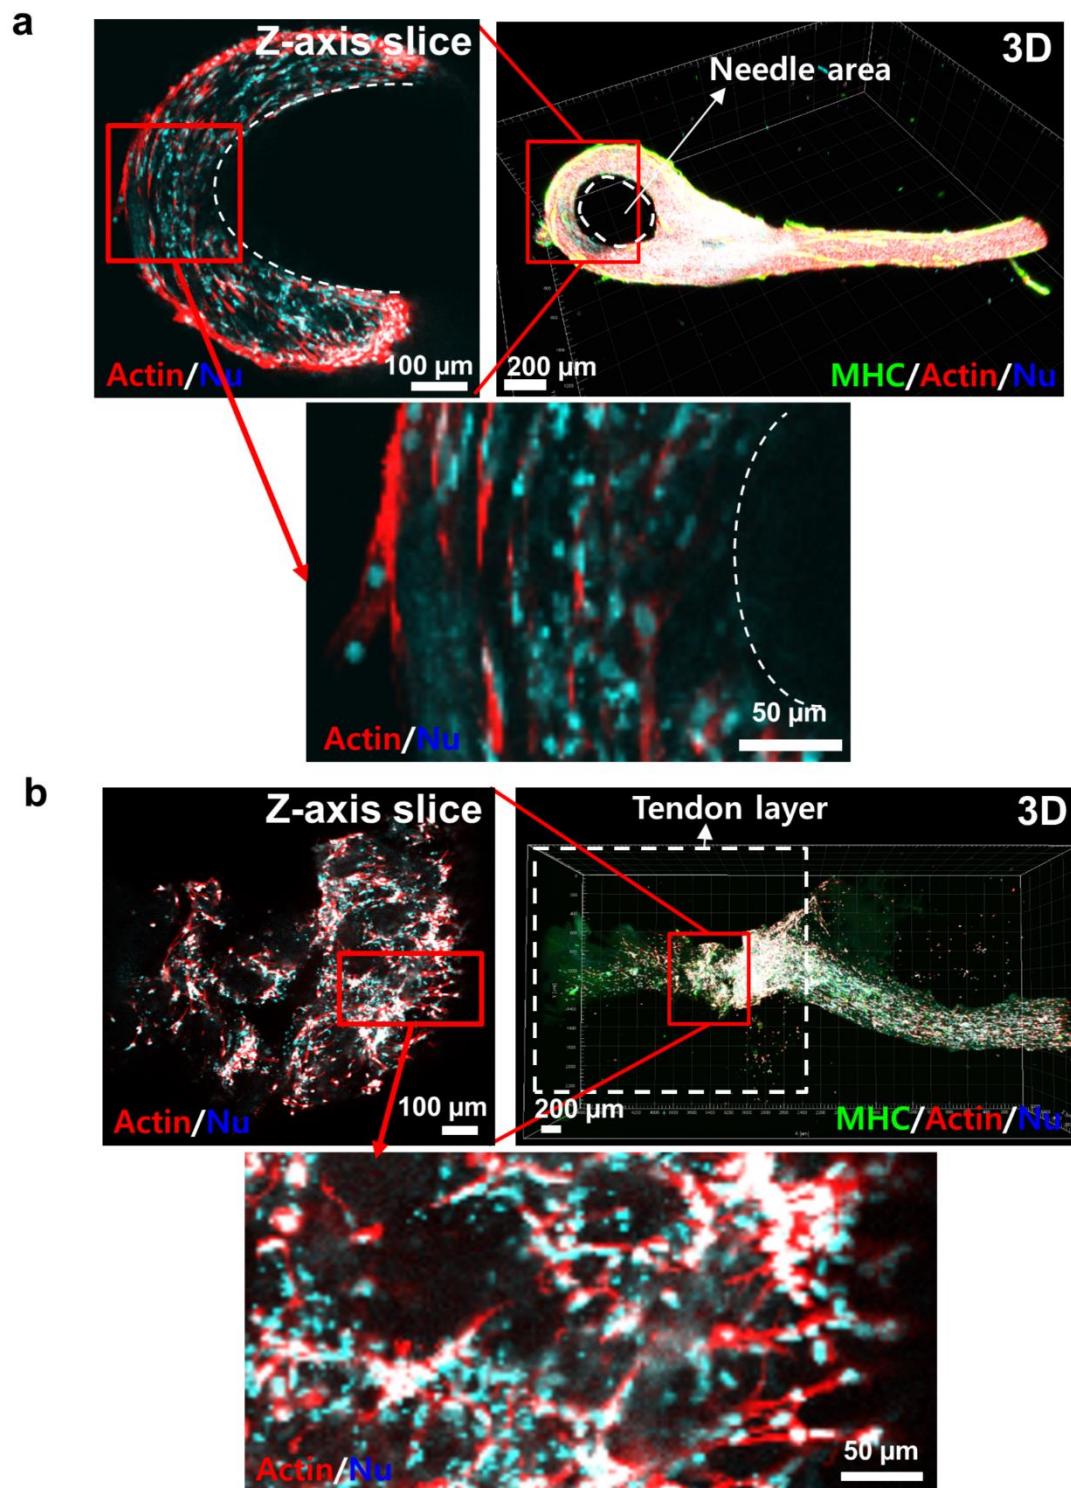

**Supplementary Fig. 16 Comparison of connection areas in needle fixed culture and TIP.** Fluorescence images (green: MHC, red: actin, and blue: nucleus) of bSCs tissues in needle fixed **(a)** culture and TIP **(b)**. Representative images from two independent experiments are shown.

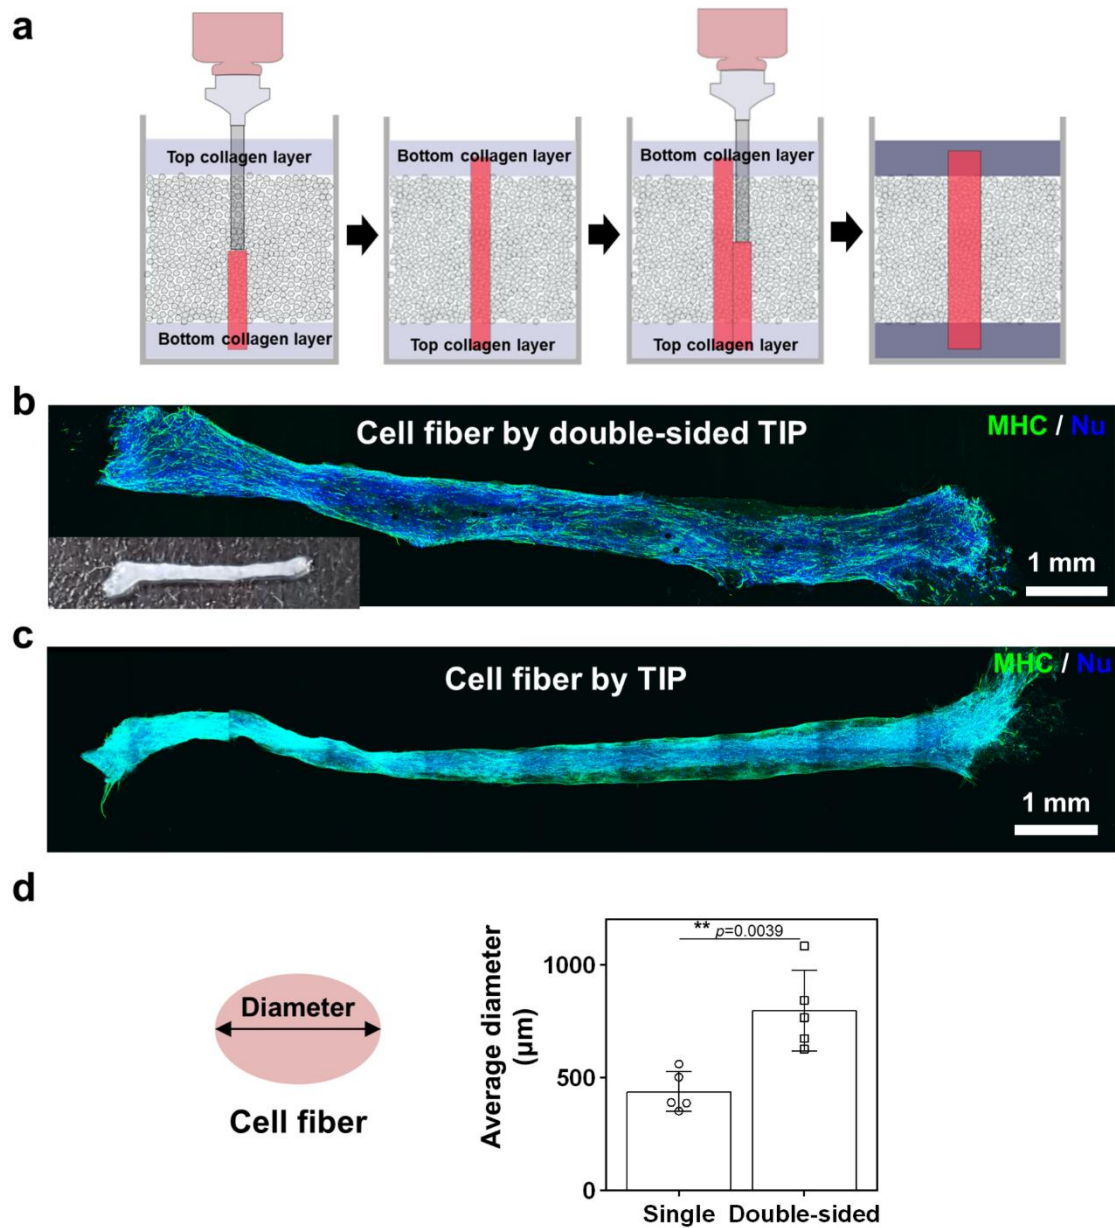

**Supplementary Fig. 17 bSCs fiber fabricated by double-sided TIP.** a, Schematic illustration of double-sided TIP, in which first printing was conducted same as general TIP and second printing was conducted at close to first printing area after flipping of the PDMS well. The two cell fibers fused into one fiber during culture. b-c, Z-projected fluorescence (green: MHC & blue: nucleus) and optical (inset) images of bSCs fiber formed by double-sided TIP on 7 day of differentiation (b) and bSCs fiber by one TIP printing on day 4 of differentiation. d, The diameters of cell fibers at 5 different spots ( $n=5$  independent regions over 1 cell fiber, a pairwise t-test comparison).  $*p<0.05$  compared to before printing. Error bars represents mean  $\pm$  s.d. Representative images from at least three independent experiments are shown. Source data are provided as a Source Data file.

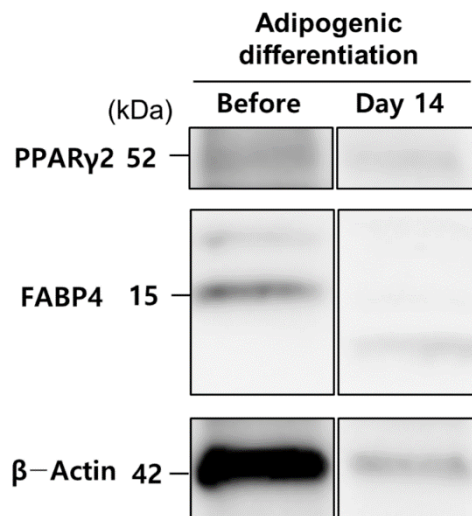

**Supplementary Fig. 18 Western blot analysis of bADSCs.** Proteins were detected by using PPAR $\gamma$ 2, FABP4, and  $\beta$ -actin antibodies. Source data are provided as a Source Data file.



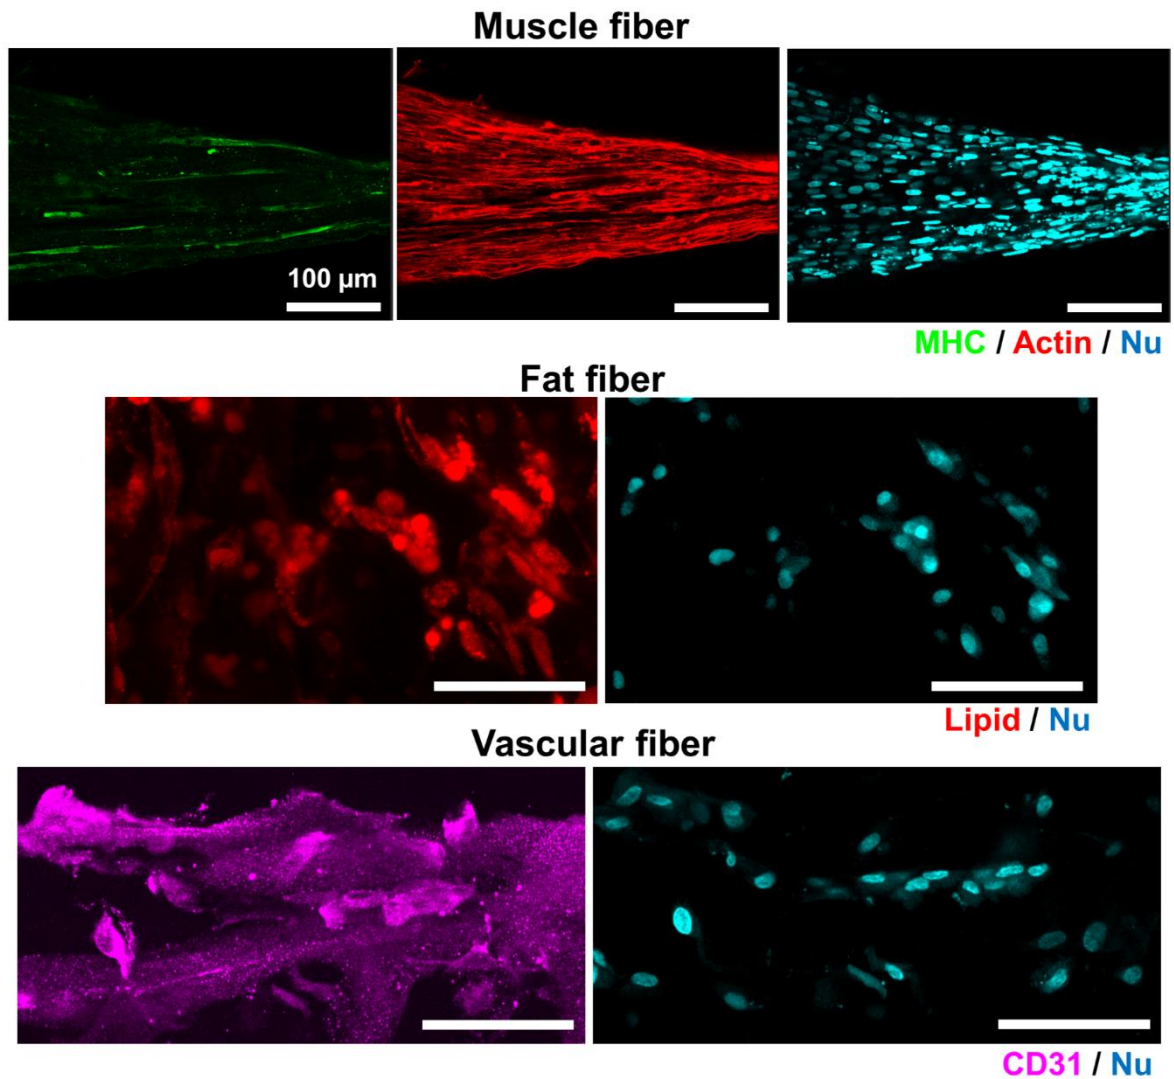

**Supplementary Fig. 19 Single-channel fluoresce images of muscle, fat, vascular fibers fabricated by TIP.** Muscle fiber on day 4 of differentiation (top, green: MHC, red: actin, and blue: nucleus), fat fiber on day 14 of differentiation (middle, red: lipid, and blue: nucleus), and vascular fiber on day 7 (bottom, magenta: CD31 and blue: nucleus). Representative images from at least three independent experiments are shown.

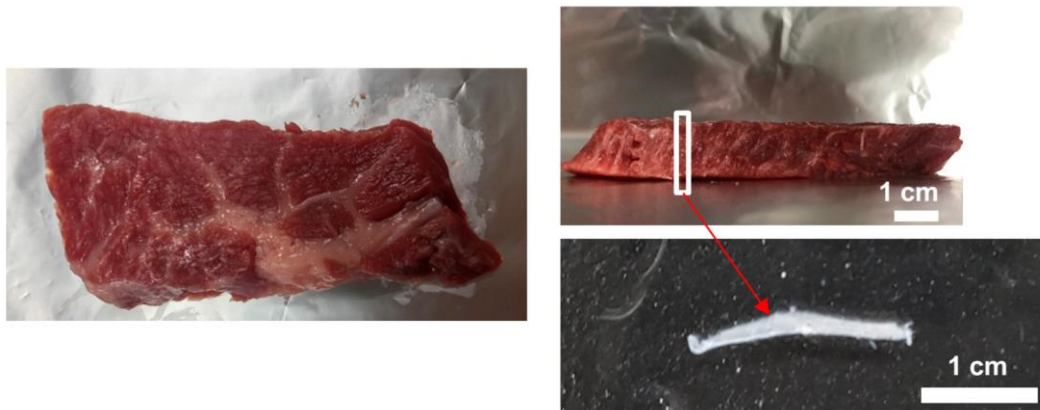

**Supplementary Fig. 20 Optical images of commercial meat.** The color of the collected fibrous tissue from commercial meat was decolorized during the 4% paraformaldehyde fixation.

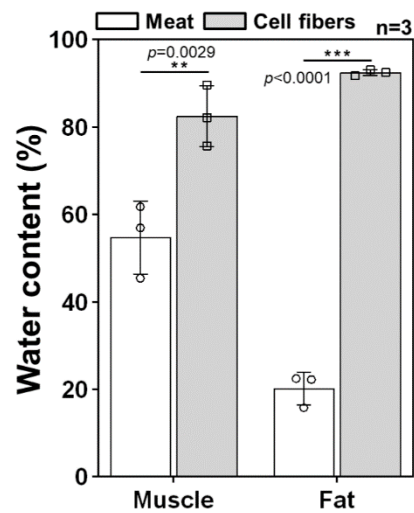

**Supplementary Fig. 21 Water content measurement of muscle and fat cell fiber from commercial meat and TIP-derived.** The weight measurement was conducted before and after freeze drying of fixed cell fibers (n=3 independent samples, pairwise t-test comparison). \* $p < 0.05$  and \*\*\* $p < 0.001$ ; error bars represent mean  $\pm$  s.d. Source data are provided as a Source Data file.

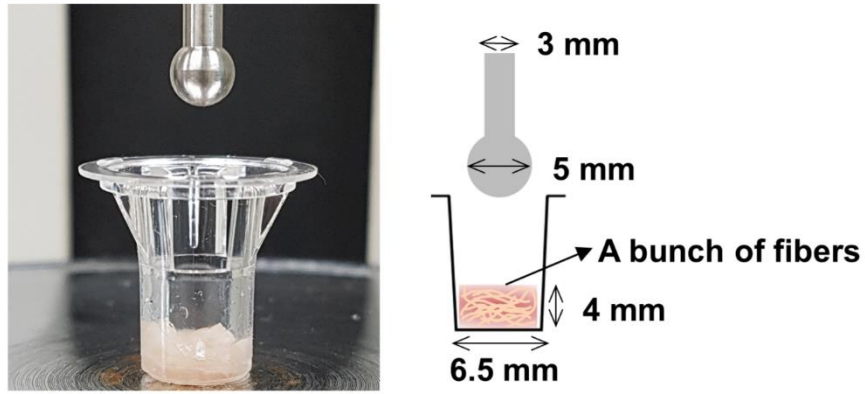

**Supplementary Fig. 22 Compressive modulus measurement set-up.** The measurement was conducted after pressing the cell fibers and fibrous tissues in the cup.

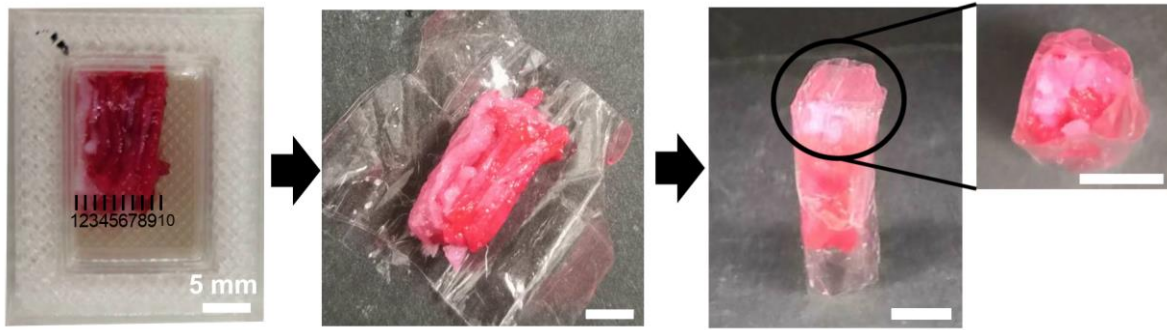

**Supplementary Fig. 23 Bovine cell fiber assembly.** After putting the cell fibers on a plastic container, treated by transglutaminase solution (10 U/mL), wrapped up with a plastic wrap, and kept at 4 °C for 2 days.



**Supplementary Table. 1 List of antibodies used in this work**

| Antibody                                                               | Clone      | Source                  | Dilution                       | Analysis                                     |
|------------------------------------------------------------------------|------------|-------------------------|--------------------------------|----------------------------------------------|
| APC mouse anti-CD29                                                    | TS2/16     | BioLegend, 303008       | 1:40                           | FACS sorting                                 |
| PE-CyTM7 mouse anti-CD56                                               | NCAM16.2   | BD, 335826              | 1:40                           | FACS sorting                                 |
| FITC mouse anti-CD31                                                   | CO.3E1D4   | BIO-RAD, MCA1097F       | 1:40                           | FACS sorting                                 |
| FITC mouse anti-CD45                                                   | 1.11.32    | BIO-RAD, MCA2220F       | 1:40                           | FACS sorting                                 |
| Mouse anti-sarcomeric alpha actinin                                    | EA-53      | Abcam, ab9465           | 1:1000                         | Immunohistochemistry                         |
| Rabbit anti-Laminin                                                    | polyclonal | Sigma-Aldrich, L9393    | 1:100                          | Immunohistochemistry                         |
| Mouse anti-CD31                                                        | JC70A      | Wako, M0823             | 1:100                          | Immunofluorescence staining                  |
| Rabbit anti-PPAR gamma                                                 | polyclonal | Abcam, ab45036          | 1:100 for IF and 1:1000 for WB | Immunofluorescence staining and Western Blot |
| Rabbit anti-FABP4                                                      | polyclonal | LSBio, LS-B4227         | 1:100 for IF and 1:1000 for WB | Immunofluorescence staining and Western Blot |
| Mouse anti-myosin 4                                                    | MF20       | eBioscience, 14-6503-82 | 1:500 for IF and 1:1000 for WB | Immunofluorescence staining and Western Blot |
| Mouse anti- $\beta$ -Actin                                             | AC-15      | Sigma-Aldrich, A5441    | 1:3000                         | Western Blot                                 |
| Anti-Mouse IgG (H+L) Cross-Adsorbed Secondary Antibody Alexa Fluor 488 | polyclonal | Invitrogen, A-11001     | 1:200                          | Immunofluorescence staining                  |
| Anti-Mouse IgG (H+L) Cross-Adsorbed Secondary Antibody Alexa Fluor 647 | polyclonal | Invitrogen, A-21235     | 1:200                          | Immunofluorescence staining                  |
| Anti-Mouse IgG conjugated to horseradish peroxidase                    | polyclonal | BIORAD, 170-6516        | 1:5000                         | Western Blot                                 |
| Anti-Rabbit IgG conjugated to horseradish peroxidase                   | polyclonal | BIORAD, 170-6515        | 1:5000                         | Western Blot                                 |

**Supplementary Table. 2 List of Taqman probes used for real time qPCR analyses**

| Probe                                                    | Gene name     | Assay ID (in Thermo Fisher Scientific) |
|----------------------------------------------------------|---------------|----------------------------------------|
| Bovine myosin heavy chain II                             | <i>MYH2</i>   | Bt03223147_gH                          |
| Bovine fatty acid binding protein 4                      | <i>FABP4</i>  | Bt03213820_m1                          |
| Bovine platelet and endothelial cell adhesion molecule 1 | <i>PECAM1</i> | Bt03215106_m1                          |
| Bovine peroxisome proliferator activated receptor gamma  | <i>PPARG</i>  | Bt03217547_m1                          |
| Bovine peptidylprolyl isomerase A                        | <i>PPIA</i>   | Bt03224615_g1                          |
